# Supplementary material
Source: PubMed Central journal article supplement (PMC4605896)
Supplement: NIHMS724265-supplement-ESI.pdf [file NIHMS724265-supplement-ESI.pdf]

***Electronic Supplementary Information (Figs. S1-S3 and Tables S1-S2).***

**Fluid displacement during droplet formation at microfluidic flow-focusing junction**

Haishui Huang<sup>ab</sup> and Xiaoming He<sup>bcd\*</sup>

<sup>a</sup>Department of Mechanical and Aerospace Engineering, The Ohio State University, Columbus, Ohio 43210, USA

<sup>b</sup>Department of Biomedical Engineering, The Ohio State University, Columbus, Ohio 43210, USA

<sup>c</sup>Davis Heart and Lung Research Institute, The Ohio State University, Columbus, Ohio 43210, USA

<sup>d</sup>Comprehensive Cancer Center, The Ohio State University, Columbus, Ohio 43210, USA

\*Correspondence should be addressed to:

Xiaoming He, Ph.D.

Department of Biomedical Engineering

The Ohio State University

308 BRT, 473 W. 12th Avenue

Columbus, OH 43210

Phone: (614) 247-8759

Fax: (614) 292-7301

Email: He.429@osu.edu

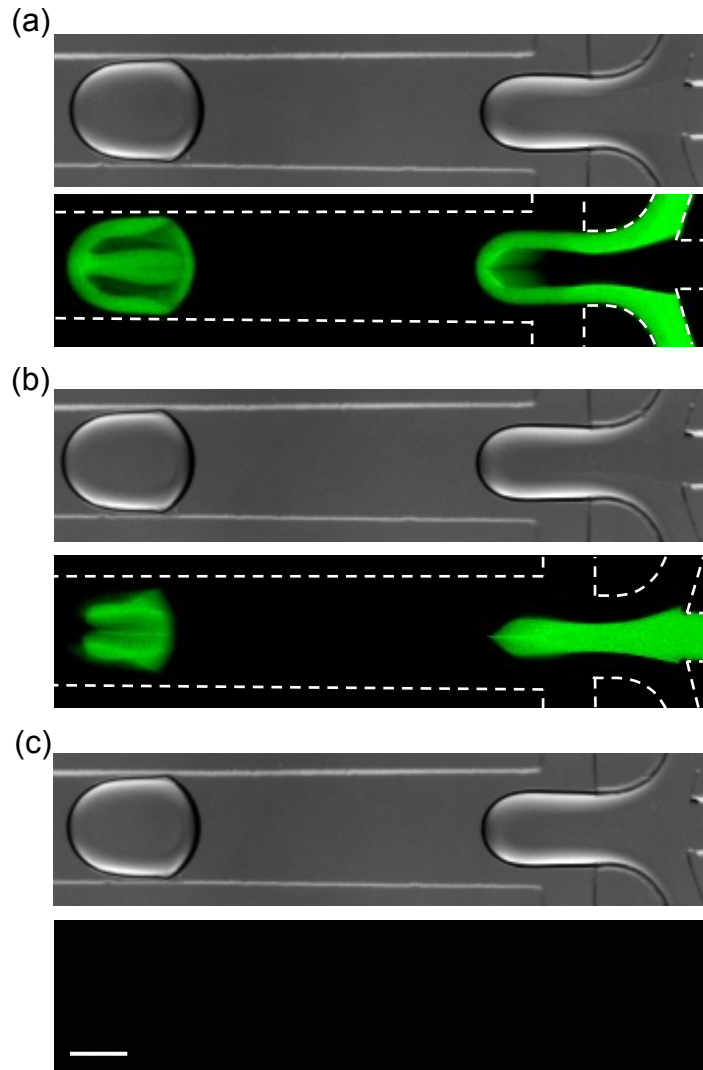

**Fig. S1.** Bright field and fluorescence images of pinched-off and pendent microdroplets showing the addition of fluorescein isothiocyanate-dextran (500 kDa) in the shell or core fluids does not affect droplet formation at the microfluidic flow-focusing junction. (a) The images of microdroplets formed with the fluorophore in shell fluid; (b) The images of microdroplets formed with the fluorophore in core fluid. (c) The images of microdroplets formed with no fluorophore in any fluid. Scale bar: 200  $\mu\text{m}$ . Experimental condition:  $\mu_{core} = \mu_{shell} = 23.4 \text{ mPa s}$ ,  $\mu_c = 30.9 \text{ mPa s}$ ,  $q_{core} = q_{shell} = 0.1 \text{ ml hr}^{-1}$ ,  $q_c = 1 \text{ ml hr}^{-1}$ , and  $\sigma = 5.55 \text{ mN m}^{-1}$ .

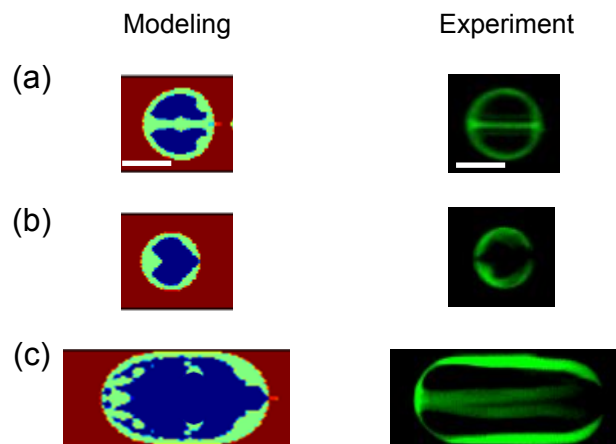

**Fig. S2.** Comparisons of results from modeling and experiments on the morphology of droplets generated by microfluidic flow-focusing junction. (a)  $\Theta$ -shaped distribution of the shell solution,  $\mu_{core} = \mu_{shell} = 23.4 \text{ mPa s}$ ,  $q_c = 2 \text{ ml h}^{-1}$ . (b) O-shaped distribution of the shell solution,  $\mu_{core} = \mu_{shell} = 599 \text{ mPa s}$ ,  $q_c = 2 \text{ ml h}^{-1}$ . (c) Reduced fluid displacement in large microdroplets,  $\mu_{core} = \mu_{shell} = 23.4 \text{ mPa s}$ ,  $q_c = 0.2 \text{ ml h}^{-1}$ . For all the studies,  $q_{shell} = 33.3 \text{ } \mu\text{l h}^{-1}$ ,  $q_{core} = 166.7 \text{ } \mu\text{l h}^{-1}$ . Scale bars,  $200 \text{ } \mu\text{m}$

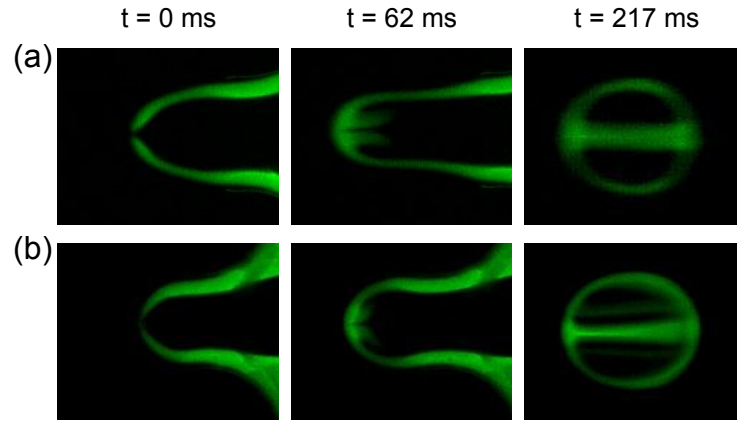

**Fig. S3.** The effect of interfacial tension on fluid displacement during droplet formation at microfluidic flow-focusing junction. (a) Strong interfacial tension causes fast but short-lasting capillary recoil,  $Ca = 339$ . (b) Small interfacial tension induces slow but long-lasting capillary recoil,  $Ca = 144$ . For both (a) and (b),  $\zeta = 3.5$ ,  $\lambda = 1.3$ ,  $I_{in}/I_{out} = 1.2$  in the final droplets. Scale bar:  $200 \mu\text{m}$ .

**Table S1.** Dynamic viscosities of various fluids determined experimentally using rheometer

| <b>Fluid</b>                           | <b>Mean viscosity (mPa s)</b> | <b>Standard deviation (mPa s)</b> |
|----------------------------------------|-------------------------------|-----------------------------------|
| Water                                  | 1.0                           | 0.1                               |
| 0.5% (w/v) M cellulose* in water       | 23.4                          | 0.2                               |
| 1% (w/v) M cellulose in water          | 93.2                          | 3.7                               |
| 2% (w/v) M cellulose in water          | 598.8                         | 9.3                               |
| 1% (w/v) H cellulose# in water         | 797.1                         | 41.5                              |
| Mineral oil                            | 30.0                          | 0.0                               |
| 1% (v/v) span 80 in mineral oil        | 30.9                          | 0.0                               |
| 2% (v/v) span 80 in mineral oil        | 32.4                          | 0.0                               |
| 5% (v/v) span 80 in mineral oil        | 33.2                          | 0.3                               |
| 10% (v/v) span 80 in mineral oil       | 36.8                          | 0.5                               |
| 20% (v/v) span 80 in mineral oil       | 42.6                          | 0.5                               |
| 30% (v/v) span 80 n mineral oil        | 49.2                          | 0.7                               |
| Mineral oil-CaCl <sub>2</sub> emulsion | 107.7                         | 1.5                               |
| 2% (w/v) alginate in water             | 23.6                          | 0.4                               |

\*Medium viscosity carboxymethyl cellulose from Sigma

#High viscosity carboxymethyl cellulose from Sigma

**Table S2.** Interfacial tension of various fluid pairs determined experimentally using contact angle goniometer

| Fluid pair                                                           | Mean interfacial tension (mN m <sup>-1</sup> ) | Standard deviation (mN m <sup>-1</sup> ) |
|----------------------------------------------------------------------|------------------------------------------------|------------------------------------------|
| Water - mineral oil                                                  | 60.0                                           | 0.6                                      |
| Water - mineral oil with 1% (v/v) span 80                            | 6.3                                            | 0.1                                      |
| Water - mineral oil with 2% (v/v) span 80                            | 5.3                                            | 0.1                                      |
| Water - mineral oil with 5% (v/v) span 80                            | 5.2                                            | 0.3                                      |
| Water - mineral oil with 10% (v/v) span 80                           | 5.0                                            | 0.2                                      |
| Water - mineral oil with 20% (v/v) span 80                           | 4.7                                            | 0.2                                      |
| Water - mineral oil with 30% (v/v) span 80                           | 4.5                                            | 0.1                                      |
| 0.5% (w/v) M* cellulose in water - mineral oil with 1% (v/v) span 80 | 5.6                                            | 0.2                                      |
| 0.5% (w/v) M cellulose in water - mineral oil with 2% (v/v) span 80  | 4.6                                            | 0.2                                      |
| 0.5% (w/v) M cellulose in water - mineral oil with 5% (v/v) span 80  | 4.2                                            | 0.1                                      |
| 0.5% (w/v) M cellulose in water - mineral oil with 10% (v/v) span 80 | 4.1                                            | 0.2                                      |
| 0.5% (w/v) M cellulose in water - mineral oil with 20% (v/v) span 80 | 4.0                                            | 0.3                                      |
| 0.5% (w/v) M cellulose in water - mineral oil with 30% (v/v) span 80 | 3.8                                            | 0.3                                      |
| 1% (w/v) M cellulose in water - mineral oil with 1% (v/v) span 80    | 4.8                                            | 0.1                                      |
| 1% (w/v) M cellulose in water - mineral oil with 2% (v/v) span 80    | 3.9                                            | 0.0                                      |
| 1% (w/v) M cellulose in water - mineral oil with 5% (v/v) span 80    | 3.7                                            | 0.2                                      |
| 1% (w/v) M cellulose in water - mineral oil with 10% (v/v) span 80   | 3.5                                            | 0.3                                      |
| 1% (w/v) M cellulose in water - mineral oil with 20% (v/v) span 80   | 3.3                                            | 0.4                                      |
| 1% (w/v) M cellulose in water - mineral oil with 30% (v/v) span 80   | 3.0                                            | 0.5                                      |

\*Medium viscosity carboxymethyl cellulose from Sigma
